# Supplementary material for: Controlled chemical etching for silicon nanocrystals with wavelength-tunable photoluminescence
Source: Royal Society of Chemistry journal article supplement (doi:10.1039/b903313k), 2009-01-01
Supplement: b903313k.pdf [file b903313k.pdf]

Supplementary information

Figure S1

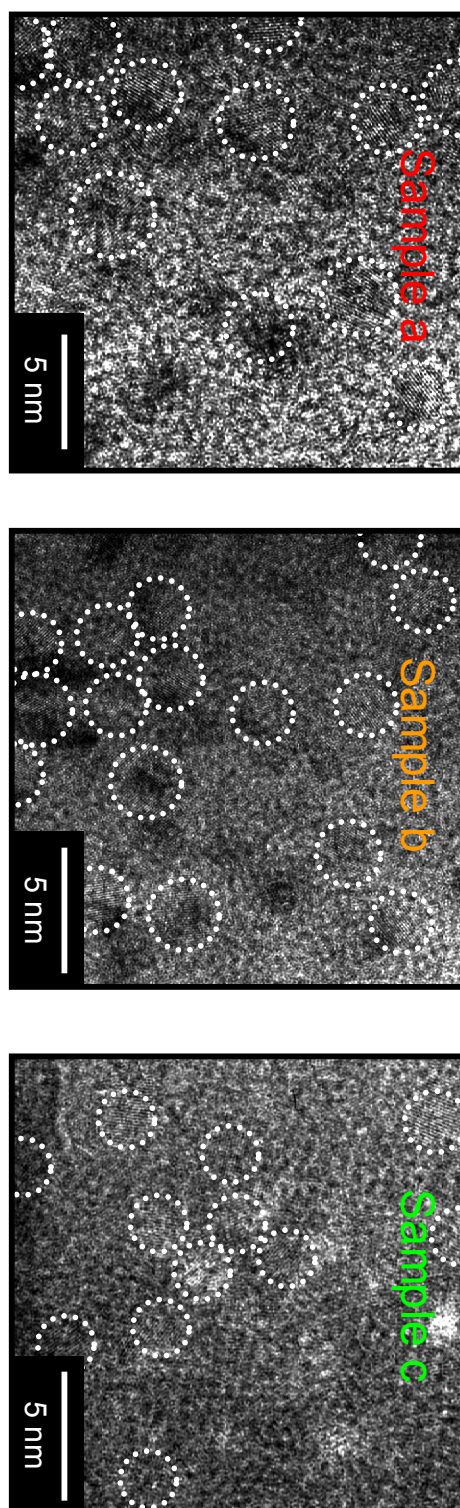

5 **Figure S1** Large-scale TEM images of the Si-nc (Samples a, b, and c).

**Figure S2**

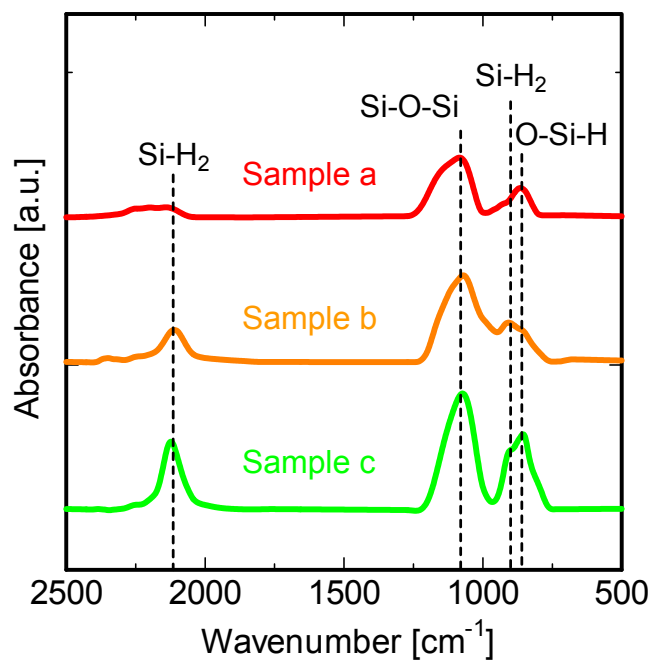

**Figure S2** IR spectra of Si-nc (Samples a, b, and c). [2100 cm<sup>-1</sup>: Stretching vibrational mode of Si-H<sub>2</sub>, 1080 cm<sup>-1</sup>: Asymmetric stretching vibrational mode of Si-O-Si, 900 cm<sup>-1</sup>: Scissors vibrational mode of Si-H<sub>2</sub>, and 880 cm<sup>-1</sup>: O-Si-H mode]

Figure S3

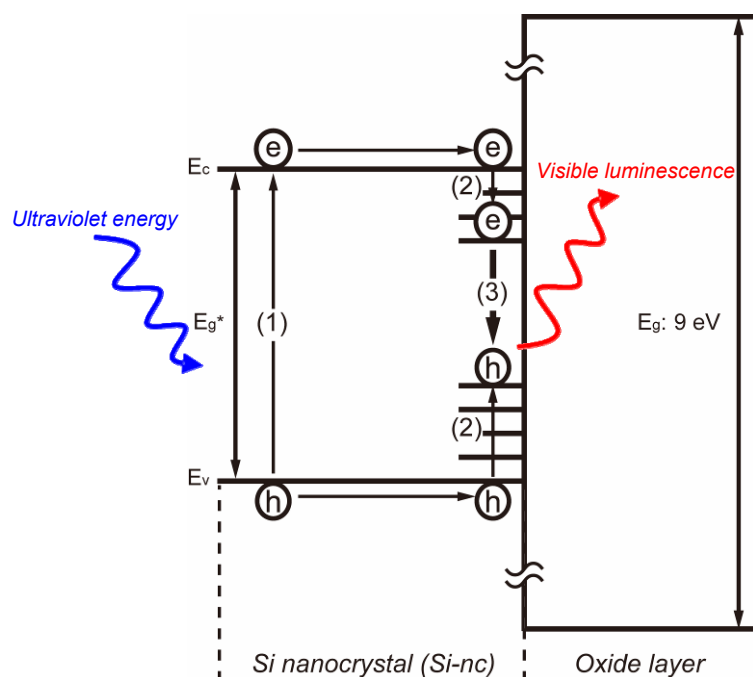

**Figure S3** Luminescent mechanism. The luminescence phenomenon is caused by the radiative recombination of an electron and a hole after UV irradiation. [ $E_c$ : Conduction band edge,  $E_v$ : Valence band edge,  $E_g^*$ : Optical bandgap energy of Si-nc,  $E_g$ : Bandgap energy of  $\text{SiO}_2$ , e: Electron, h: Hole]
